# Supplementary material
Source: PubMed Central journal article supplement (PMC5218593)
Supplement: NIHMS840096-supplement-Supplemental.pdf [file NIHMS840096-supplement-Supplemental.pdf]

## Supporting Information

### **Dual-enhanced photothermal conversion property of reduced graphene oxide-coated gold superparticles for light-triggered acoustic and thermal theranostics**

Li-Sen Lin, Xiangyu Yang, Gang Niu, Jibin Song,\* Huang-Hao Yang,\* and Xiaoyuan Chen\*

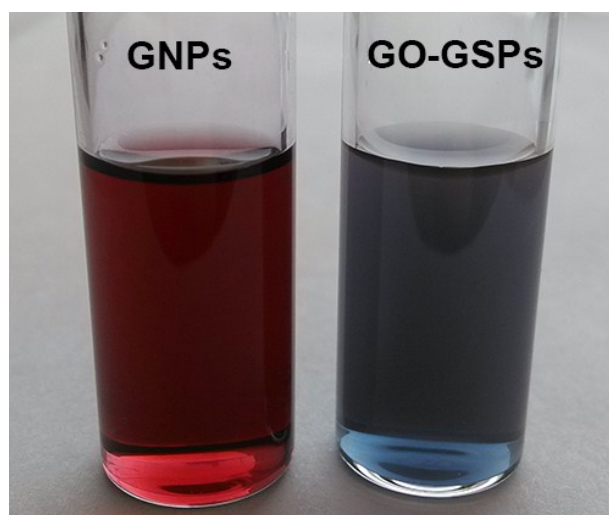

**Fig. S1.** Digital image of GNPs in chloroform and 90 nm GO-GSPs in water. The colour change demonstrated the successful assembly of GNPs.

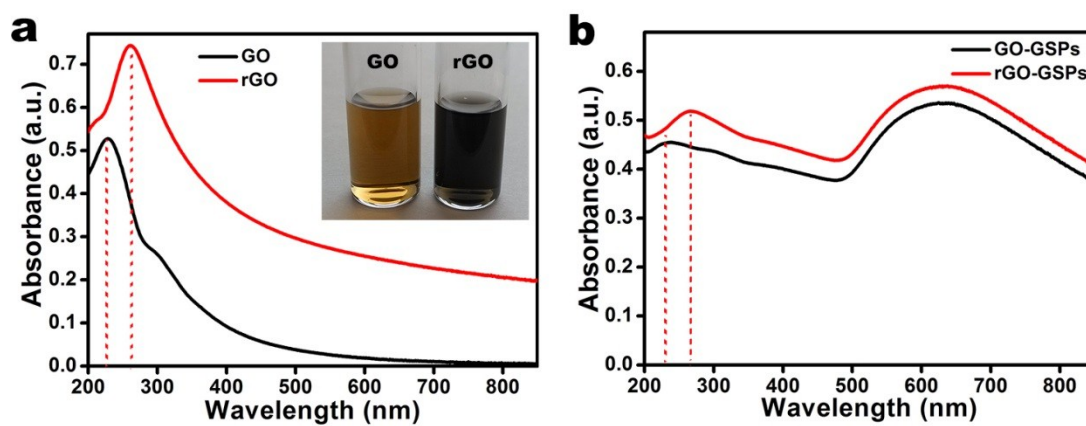

**Fig. S2.** (a) UV-vis spectra of GO and rGO. (b) UV-vis spectra of GO-GSPs and rGO-GSPs.

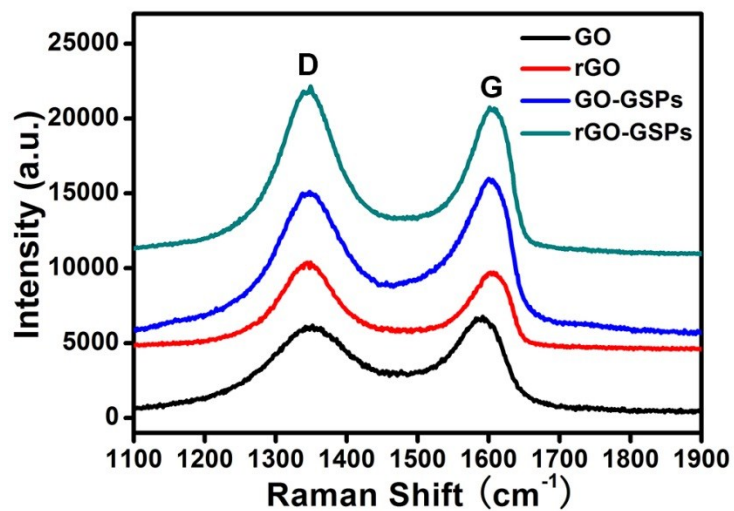

**Fig. S3.** Raman spectra of GO, rGO, GO-GSPs, and rGO-GSPs.

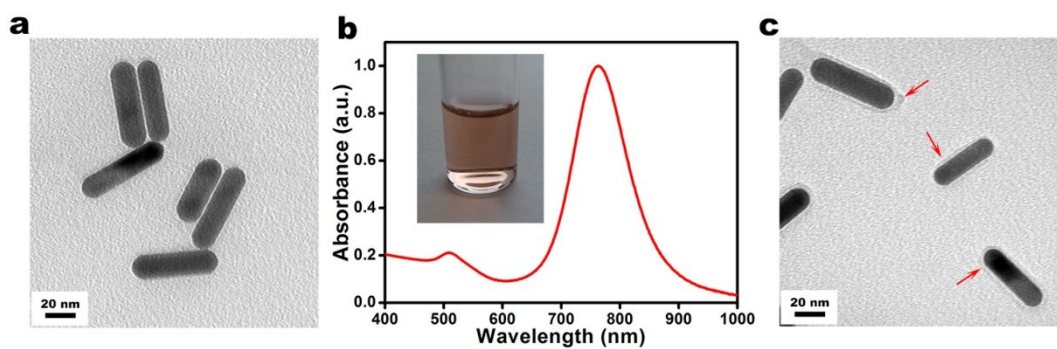

**Fig. S4.** (a) TEM image and (b) UV-vis spectrum of CTAB-capped GNRs. Inset in (b) is the photo of the GNRs dispersed in water. (c) TEM image of rGO-GNRs. The red arrows point to the rGO shell.

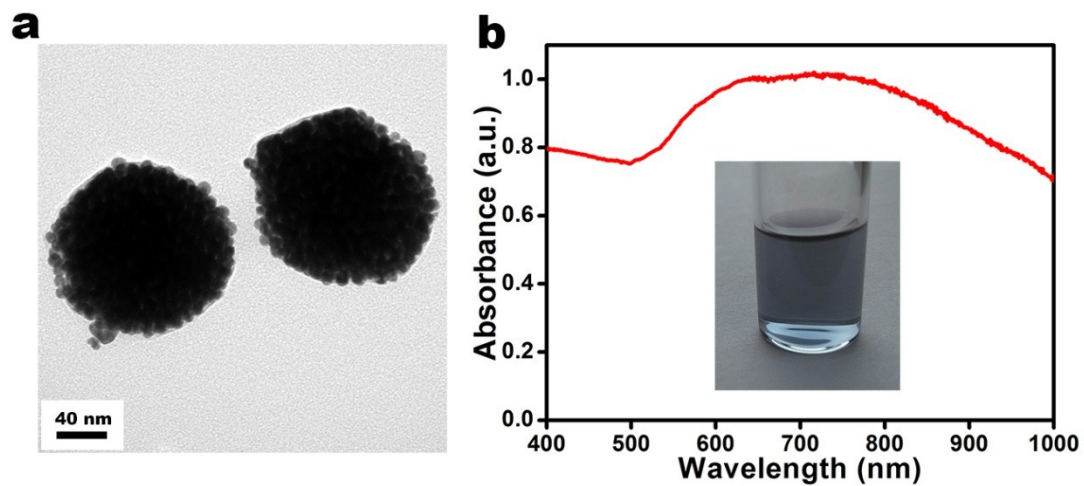

**Fig. S5.** (a) TEM image and (b) UV-vis spectrum of GSPs. Inset in (b) is the photo of the GSPs dispersed in water.

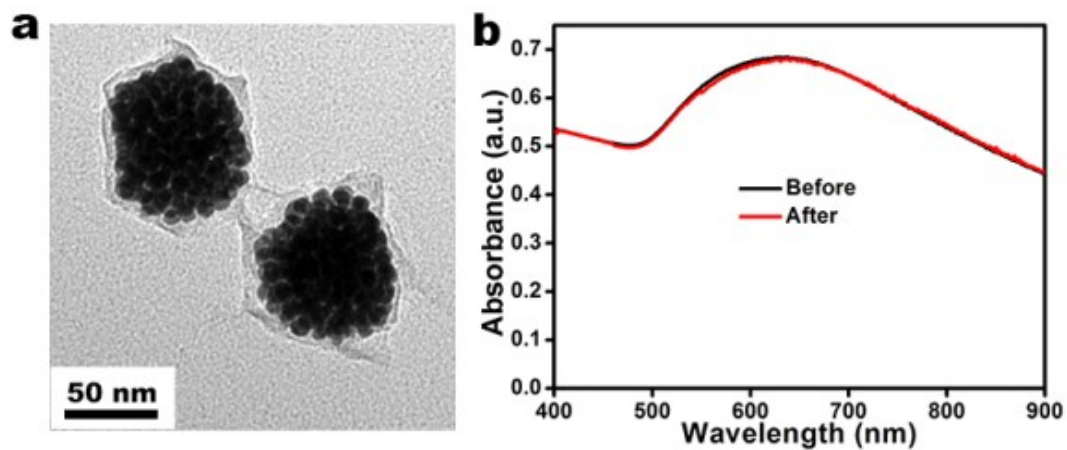

**Fig. S6.** (a) TEM image of rGO-GSPs after 808 nm laser irradiation at a power density of  $1 \text{ W cm}^{-2}$  for 30 min. (b) UV-vis spectra of rGO-GSPs before and after laser irradiation ( $1 \text{ W cm}^{-2}$ , 30 min).

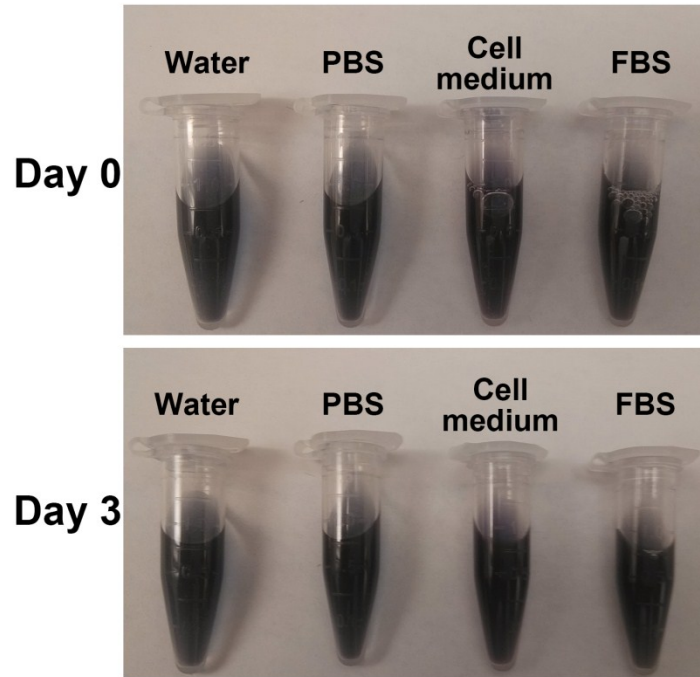

**Fig. S7.** Photos of PEG-rGO-GSPs in water, PBS, cell culture medium, and fetal bovine serum (FBS), showing good dispersibility in different media without obvious aggregation.

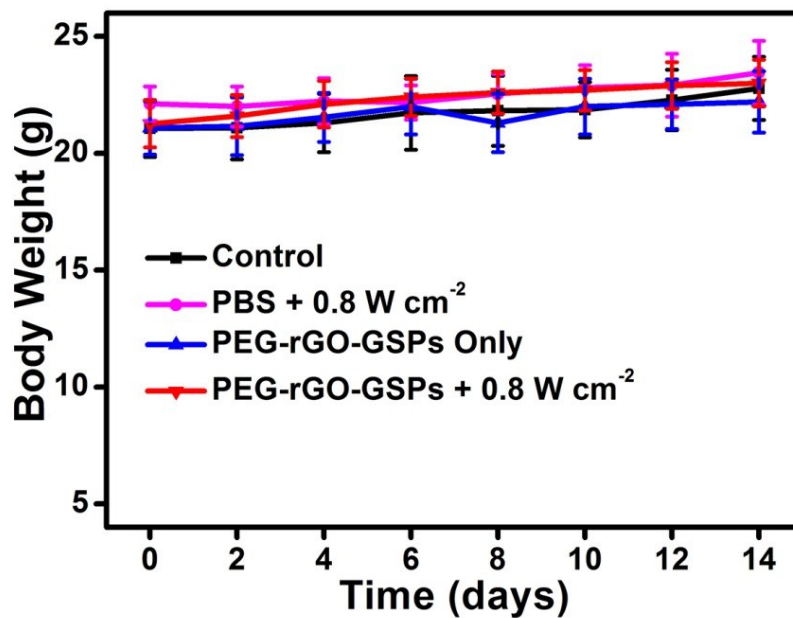

**Fig. S8.** Body weight curves of U87MG tumour-bearing mice at different time points after various treatments.

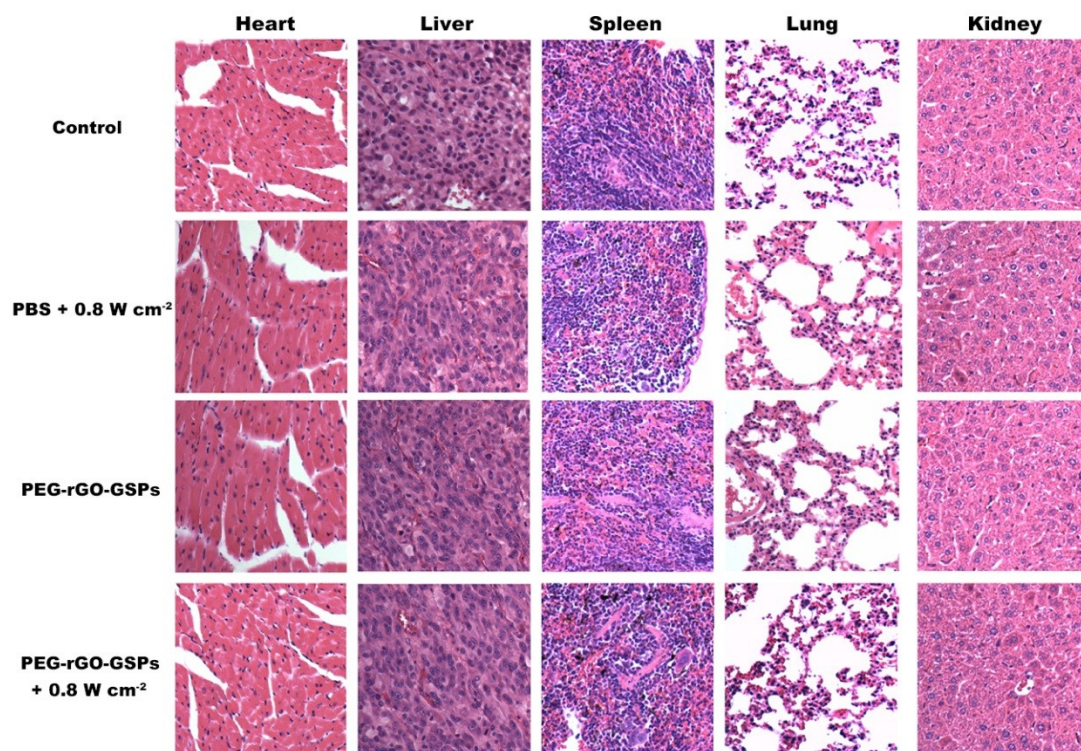

**Fig. S9.** Representative H&E stained images of major organs collected from different groups of mice at 14 days post-treatment.
